# Supplementary material for: Ultra-high throughput functional enrichment of large monoamine oxidase (MAO-N) libraries by fluorescence activated cell sorting
Source: Analyst. 2018 Sep 10;143(19):4747–55. doi: 10.1039/c8an00851e (PMC6156879; doi:10.1039/c8an00851e)
Supplement: Supplementary file 1 [file AN-143-C8AN00851E-s001.pdf]

# Ultra-high throughput functional enrichment of large monoamine oxidase (MAO-N) libraries by fluorescence activated cell sorting

## Supporting Information

<sup>1,2,3</sup>Joanna C. Sadler, Andrew Currin & <sup>1,2,3,\*</sup>Douglas B. Kell

<sup>1</sup>School of Chemistry, <sup>2</sup>The Manchester Institute of Biotechnology, <sup>3</sup>Centre for the Synthetic Biology of Fine and Speciality Chemicals (SYNBIOCHEM), The University of Manchester, 131 Princess St, Manchester M1 7DN, UK.

[joanna.sadler@manchester.ac.uk](mailto:joanna.sadler@manchester.ac.uk), [dbk@manchester.ac.uk](mailto:dbk@manchester.ac.uk)

\*corresponding author <http://dbkgroup.org/> @dbkell

### Contents

|                                                              |   |
|--------------------------------------------------------------|---|
| Effect of freeze-thaw step on probe uptake.....              | 2 |
| Comparison between K12 and B strains of <i>E. coli</i> ..... | 3 |
| Identification of an assay quenching agent .....             | 4 |

## Effect of freeze-thaw step on probe uptake

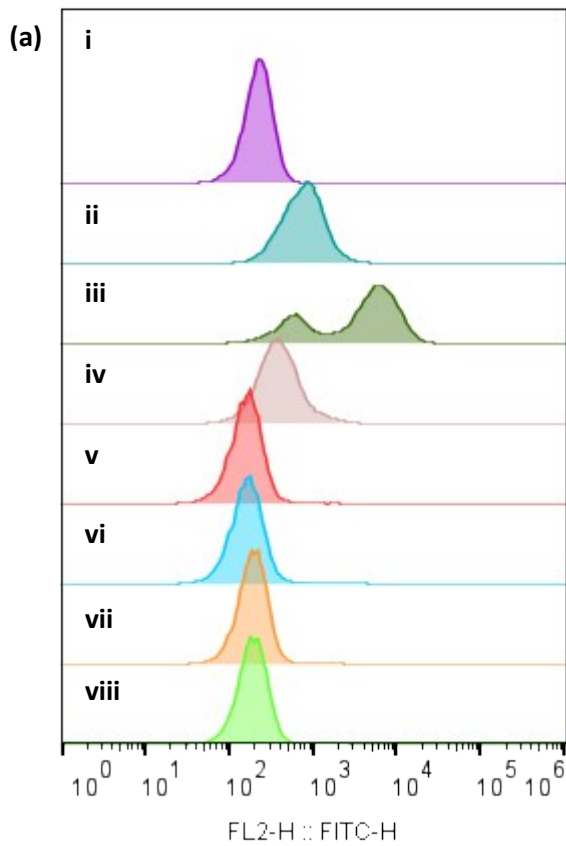

| (a)  | Sample                                           | Population  | Mean FITC-H | FITC-H CV |
|------|--------------------------------------------------|-------------|-------------|-----------|
| i    | Induced freeze-thawed cells only                 | Total gated | 232         | 36        |
| ii   | Induced freeze-thawed + probe                    | Total gated | 861         | 56        |
| iii  | Induced freeze-thawed + probe + AMBA             | Positive    | 6512        | 51        |
| iv   | Induced Non-induced freeze-thawed + probe + AMBA | Total gated | 464         | 74        |
| v    | Induced + probe                                  | Total gated | 183         | 98        |
| vi   | Induced + probe + substrate                      | Total gated | 202         | 155       |
| vii  | Non-Induced + probe                              | Total gated | 217         | 81        |
| viii | Non-Induced + probe + substrate                  | Total gated | 222         | 94        |

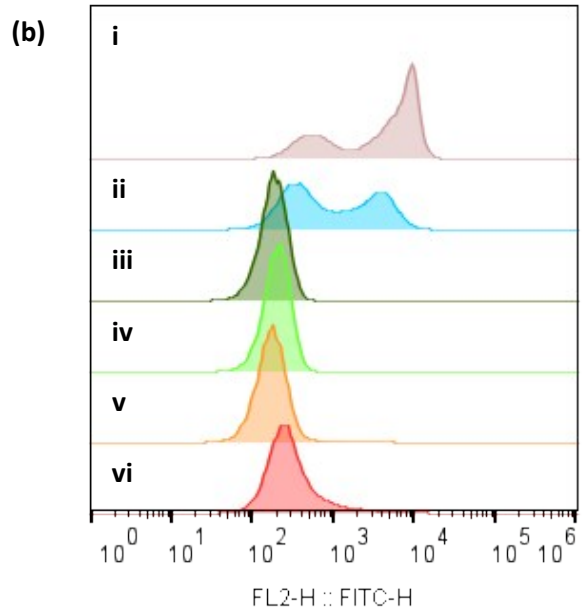

| (b) | Sample                                                            | Population  | Mean FITC-H | FITC-H CV |
|-----|-------------------------------------------------------------------|-------------|-------------|-----------|
| i   | Induced freeze-thawed + probe + H <sub>2</sub> O <sub>2</sub>     | Positive    | 7240        | 42        |
| ii  | Non-Induced freeze-thawed + probe + H <sub>2</sub> O <sub>2</sub> | Total gated | 3591        | 53        |
| iii | Induced freeze-thawed + H <sub>2</sub> O <sub>2</sub>             | Positive    | 189         | 38        |
| iv  | Non-Induced freeze-thawed + H <sub>2</sub> O <sub>2</sub>         | Total gated | 208         | 37        |
| v   | Induced + probe + H <sub>2</sub> O <sub>2</sub>                   | Total gated | 222         | 181       |
| vi  | Non-induced + probe + H <sub>2</sub> O <sub>2</sub>               | Total gated | 492         | 223       |

**Figure S1.** (a) Comparison between the fluorescence of induced and non-induced *E. coli* cells expressing MAO-N before and after a freeze-thaw step. (b) Effect of freeze-thaw step on probe uptake of induced and non-induced cells determined by spiking with 10  $\mu$ M H<sub>2</sub>O<sub>2</sub>.

### Comparison between K12 and B strains of *E. coli*

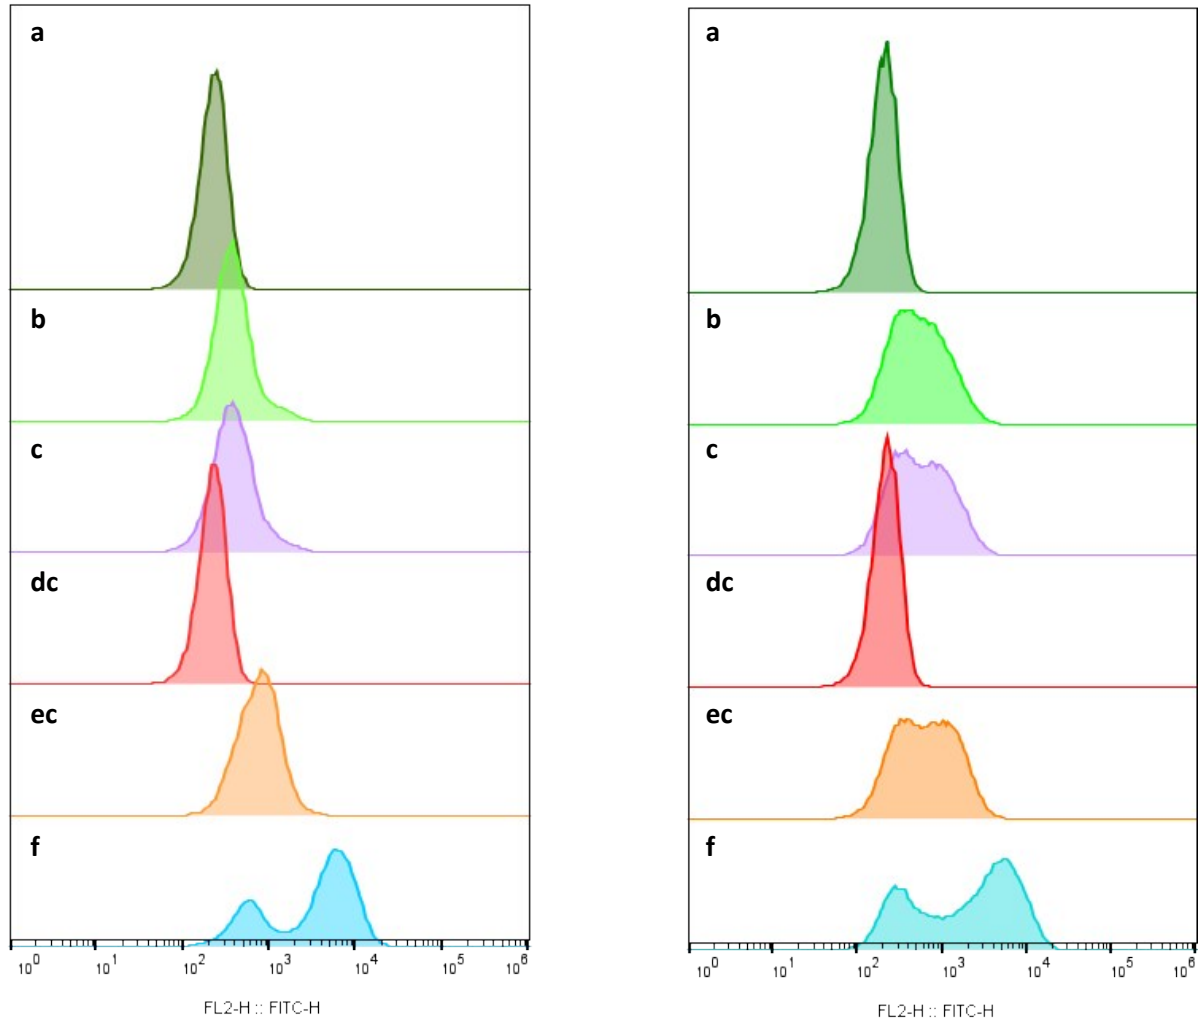

|   | Sample                          | Population  | Mean FITC-H | FITC-H CV |
|---|---------------------------------|-------------|-------------|-----------|
| a | T7 Non-Induced                  | Total gated | 237         | 36        |
| b | T7 Non-Induced + probe          | Total gated | 445         | 69        |
| c | T7 Non-Induced + probe + AMBA   | Positive    | 464         | 74        |
| d | T7 Induced                      | Total gated | 232         | 36        |
| e | T7 Induced + probe              | Total gated | 861         | 56        |
| f | T7 Induced cells + probe + AMBA | Positive    | 6512        | 51        |

|   | Sample                                | Population  | Mean FITC-H | FITC-H CV |
|---|---------------------------------------|-------------|-------------|-----------|
| a | 5-alpha Non-Induced                   | Total gated | 211         | 40        |
| b | 5- alpha Non-Induced + probe          | Total gated | 694         | 84        |
| c | 5- alpha Non-Induced + probe + AMBA   | Positive    | 758         | 86        |
| d | 5- alpha Induced                      | Total gated | 227         | 38        |
| e | 5- alpha Induced + probe              | Total gated | 859         | 84        |
| f | 5- alpha Induced cells + probe + AMBA | Positive    | 5340        | 68        |

**Figure S2.** Comparison between (a) T7 express (B strain) and (b) 5-alpha cells (K12 strain) as hosts for the oxidase activity assay. For detection of B strain cells, it was necessary to reduce the FSC threshold to 1.5%.

### Identification of an assay quenching agent

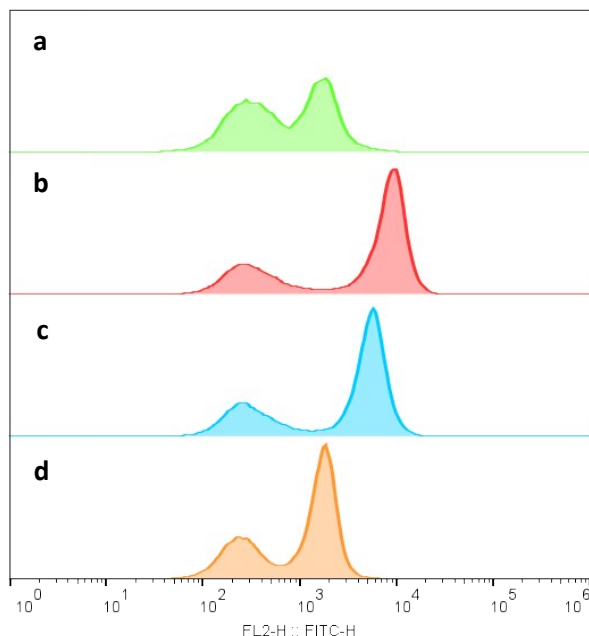

|   | Sample                                    | Population | Mean FITC-H | FITC-H CV |
|---|-------------------------------------------|------------|-------------|-----------|
| a | No quench, t=5                            | Positive   | 1721        | 40        |
| b | No quench; t=30                           | Positive   | 8716        | 38        |
| c | 10 mM sodium pyruvate at t=5 <sup>a</sup> | Positive   | 5589        | 38        |
| d | 10 mM L-ascorbic acid at t=5 <sup>a</sup> | Positive   | 1739        | 36        |

**Figure S3.** Fluorescence of *E. coli* cells under the optimised assay conditions after (a) 5 minutes incubation with AMBA; (b) 30 minutes incubation with AMBA; (c) quenching with 10 mM sodium pyruvate after 5 minutes incubation with AMBA; (d) quenching with 10 mM ascorbic acid after 5 minutes incubation with AMBA. <sup>a</sup>Cells were analysed 30 minutes after quenching.

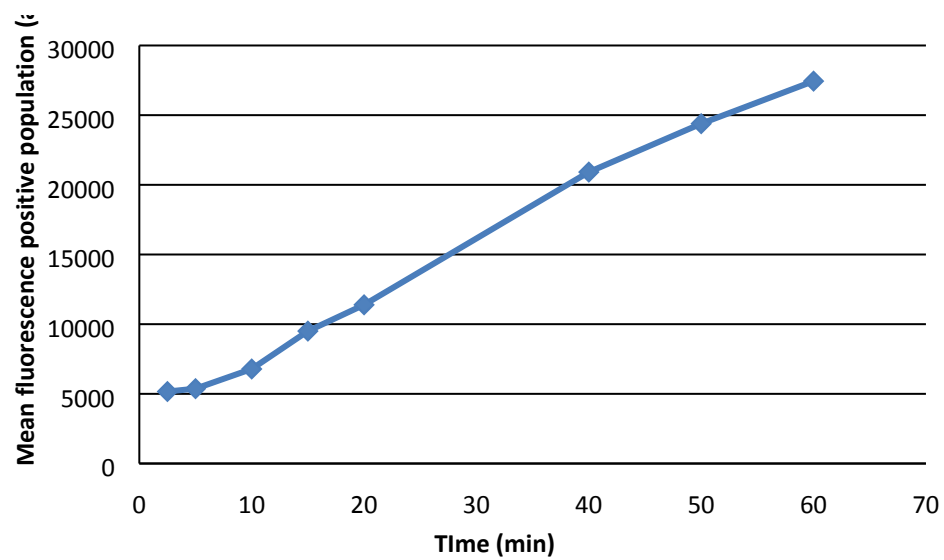

**Figure S4.** Mean fluorescence of *E. coli* cells under the optimised assay conditions quenched with 10 mM ascorbic acid at different timepoints after addition of AMBA.
